# Supplementary material
Source: PubMed Central journal article supplement (PMC7383083)
Supplement: jnm233411SupplementalData.pdf [file jnm233411SupplementalData.pdf]

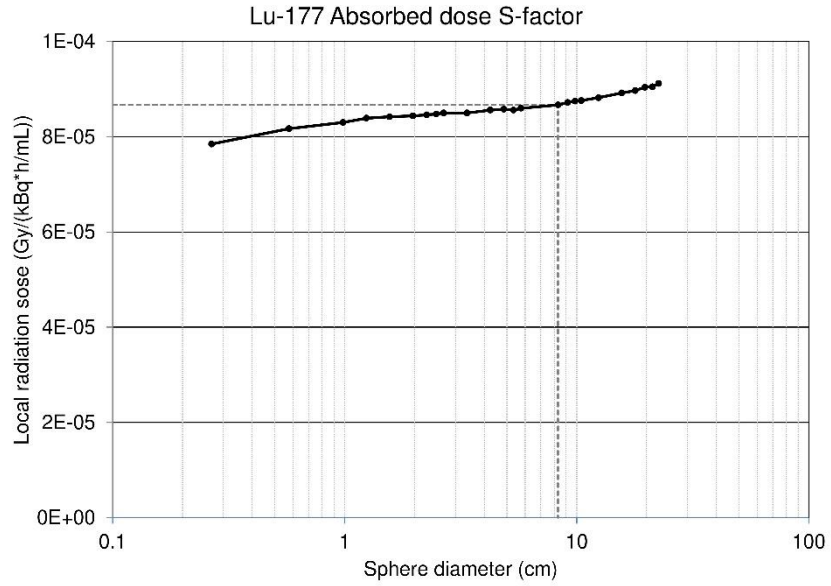

**Supplemental Figure 1 - Time-integrated Activity Concentration (kBq\*h/ml) to Radiation Absorbed Dose (Gy) S-factors as a function of object diameter for <sup>177</sup>Lu according to OLINDA sphere model. For regions with masses between 0.5g and 5,000g the dose factor is within ±5% of 8.67E-5 Gy/(kBq\*h/mL)**

| <u>Image Time (hours)</u> | <u>Submandibular</u> | <u>Tumor</u> | <u>Parotid</u> | <u>Spleen</u> | <u>Kidney</u> | <u>Liver</u> |
|---------------------------|----------------------|--------------|----------------|---------------|---------------|--------------|
| 5                         | 62.1                 | 157.9        | 59.4           | 39.6          | 42.5          | 46.4         |
| 6                         | 62.0                 | 149.0        | 59.8           | 45.4          | 45.5          | 51.2         |
| 7                         | 62.3                 | 142.7        | 60.5           | 51.4          | 48.6          | 56.0         |
| 8                         | 62.7                 | 138.2        | 61.2           | 57.6          | 51.5          | 60.6         |
| 9                         | 63.4                 | 134.7        | 62.1           | 63.6          | 54.4          | 65.0         |
| 10                        | 64.1                 | 132.2        | 62.9           | 69.4          | 57.1          | 69.1         |
| 11                        | 64.8                 | 130.2        | 63.9           | 74.8          | 59.7          | 72.8         |
| 12                        | 65.7                 | 128.8        | 64.8           | 79.7          | 62.1          | 76.2         |
| 13                        | 66.5                 | 127.7        | 65.8           | 84.2          | 64.4          | 79.2         |
| 14                        | 67.4                 | 126.9        | 66.7           | 88.1          | 66.4          | 82.0         |
| 15                        | 68.3                 | 126.4        | 67.7           | 91.6          | 68.4          | 84.5         |
| 16                        | 69.1                 | 126.0        | 68.7           | 94.7          | 70.2          | 86.7         |
| 17                        | 70.1                 | 125.8        | 69.7           | 97.4          | 71.9          | 88.7         |
| 18                        | 71.0                 | 125.7        | 70.7           | 99.8          | 73.5          | 90.6         |
| 19                        | 71.9                 | 125.7        | 71.7           | 101.9         | 75.1          | 92.3         |
| 20                        | 72.9                 | 125.8        | 72.7           | 103.8         | 76.6          | 93.8         |
| 21                        | 73.9                 | 126.0        | 73.7           | 105.6         | 78.0          | 95.3         |
| 22                        | 74.9                 | 126.3        | 74.8           | 107.3         | 79.5          | 96.8         |
| 23                        | 75.9                 | 126.6        | 75.8           | 108.8         | 80.9          | 98.1         |
| 24                        | 76.9                 | 126.9        | 76.9           | 110.3         | 82.2          | 99.5         |
| 25                        | 77.9                 | 127.3        | 78.0           | 111.8         | 83.6          | 100.8        |
| 26                        | 79.0                 | 127.7        | 79.1           | 113.2         | 85.0          | 102.0        |
| 27                        | 80.1                 | 128.1        | 80.2           | 114.6         | 86.4          | 103.3        |
| 28                        | 81.2                 | 128.6        | 81.4           | 115.9         | 87.8          | 104.5        |
| 29                        | 82.3                 | 129.0        | 82.5           | 117.3         | 89.2          | 105.8        |
| 30                        | 83.4                 | 129.5        | 83.7           | 118.6         | 90.6          | 107.0        |
| 31                        | 84.6                 | 130.0        | 84.9           | 120.0         | 92.0          | 108.3        |
| 32                        | 85.7                 | 130.5        | 86.1           | 121.4         | 93.4          | 109.5        |
| 33                        | 86.9                 | 131.1        | 87.3           | 122.7         | 94.9          | 110.8        |
| 34                        | 88.1                 | 131.6        | 88.6           | 124.1         | 96.3          | 112.1        |
| 35                        | 89.3                 | 132.2        | 89.8           | 125.5         | 97.8          | 113.3        |
| 36                        | 90.6                 | 132.7        | 91.1           | 126.9         | 99.3          | 114.6        |
| 37                        | 91.9                 | 133.3        | 92.4           | 128.3         | 100.9         | 115.9        |
| 38                        | 93.1                 | 133.9        | 93.7           | 129.8         | 102.4         | 117.3        |
| 39                        | 94.4                 | 134.4        | 95.1           | 131.3         | 104.0         | 118.6        |
| 40                        | 95.8                 | 135.0        | 96.4           | 132.7         | 105.6         | 120.0        |
| 41                        | 97.1                 | 135.6        | 97.8           | 134.2         | 107.2         | 121.3        |
| 42                        | 98.5                 | 136.2        | 99.2           | 135.8         | 108.9         | 122.7        |
| 43                        | 99.9                 | 136.8        | 100.7          | 137.3         | 110.5         | 124.2        |
| 44                        | 101.3                | 137.4        | 102.1          | 138.9         | 112.3         | 125.6        |
| 45                        | 102.7                | 138.1        | 103.6          | 140.5         | 114.0         | 127.0        |
| 46                        | 104.2                | 138.7        | 105.1          | 142.1         | 115.7         | 128.5        |
| 47                        | 105.7                | 139.3        | 106.6          | 143.7         | 117.5         | 130.0        |
| 48                        | 107.2                | 139.9        | 108.2          | 145.4         | 119.3         | 131.5        |
| 49                        | 108.7                | 140.6        | 109.7          | 147.0         | 121.2         | 133.0        |
| 50                        | 110.3                | 141.2        | 111.3          | 148.7         | 123.1         | 134.6        |
| 51                        | 111.8                | 141.9        | 113.0          | 150.5         | 125.0         | 136.1        |
| 52                        | 113.4                | 142.5        | 114.6          | 152.2         | 126.9         | 137.7        |
| 53                        | 115.1                | 143.2        | 116.3          | 154.0         | 128.9         | 139.4        |
| 54                        | 116.7                | 143.8        | 118.0          | 155.8         | 130.9         | 141.0        |
| 55                        | 118.4                | 144.5        | 119.7          | 157.6         | 132.9         | 142.7        |
| 56                        | 120.1                | 145.1        | 121.5          | 159.5         | 135.0         | 144.3        |
| 57                        | 121.8                | 145.8        | 123.3          | 161.4         | 137.1         | 146.0        |
| 58                        | 123.6                | 146.5        | 125.1          | 163.3         | 139.2         | 147.8        |
| 59                        | 125.4                | 147.2        | 126.9          | 165.2         | 141.4         | 149.5        |

|     |       |       |       |       |       |       |
|-----|-------|-------|-------|-------|-------|-------|
| 60  | 127.2 | 147.9 | 128.8 | 167.2 | 143.6 | 151.3 |
| 61  | 129.1 | 148.5 | 130.7 | 169.2 | 145.9 | 153.1 |
| 62  | 130.9 | 149.2 | 132.6 | 171.2 | 148.2 | 154.9 |
| 63  | 132.8 | 149.9 | 134.6 | 173.3 | 150.5 | 156.8 |
| 64  | 134.8 | 150.6 | 136.6 | 175.3 | 152.9 | 158.7 |
| 65  | 136.7 | 151.3 | 138.7 | 177.5 | 155.3 | 160.6 |
| 66  | 138.7 | 152.1 | 140.7 | 179.6 | 157.7 | 162.5 |
| 67  | 140.8 | 152.8 | 142.8 | 181.8 | 160.2 | 164.5 |
| 68  | 142.8 | 153.5 | 145.0 | 184.0 | 162.7 | 166.5 |
| 69  | 144.9 | 154.2 | 147.2 | 186.2 | 165.3 | 168.5 |
| 70  | 147.1 | 154.9 | 149.4 | 188.5 | 167.9 | 170.5 |
| 71  | 149.2 | 155.7 | 151.6 | 190.8 | 170.5 | 172.6 |
| 72  | 151.4 | 156.4 | 153.9 | 193.2 | 173.2 | 174.7 |
| 73  | 153.7 | 157.2 | 156.2 | 195.6 | 176.0 | 176.8 |
| 74  | 156.0 | 157.9 | 158.6 | 198.0 | 178.8 | 179.0 |
| 75  | 158.3 | 158.7 | 161.0 | 200.4 | 181.6 | 181.2 |
| 76  | 160.6 | 159.4 | 163.5 | 202.9 | 184.5 | 183.4 |
| 77  | 163.0 | 160.2 | 165.9 | 205.5 | 187.4 | 185.7 |
| 78  | 165.4 | 160.9 | 168.5 | 208.0 | 190.4 | 188.0 |
| 79  | 167.9 | 161.7 | 171.1 | 210.6 | 193.4 | 190.3 |
| 80  | 170.4 | 162.5 | 173.7 | 213.3 | 196.5 | 192.6 |
| 81  | 172.9 | 163.3 | 176.3 | 216.0 | 199.7 | 195.0 |
| 82  | 175.5 | 164.1 | 179.1 | 218.7 | 202.9 | 197.4 |
| 83  | 178.2 | 164.9 | 181.8 | 221.5 | 206.1 | 199.9 |
| 84  | 180.8 | 165.7 | 184.6 | 224.3 | 209.4 | 202.4 |
| 85  | 183.6 | 166.5 | 187.5 | 227.1 | 212.8 | 204.9 |
| 86  | 186.3 | 167.3 | 190.4 | 230.0 | 216.2 | 207.5 |
| 87  | 189.1 | 168.1 | 193.3 | 233.0 | 219.7 | 210.1 |
| 88  | 192.0 | 168.9 | 196.4 | 236.0 | 223.2 | 212.7 |
| 89  | 194.9 | 169.7 | 199.4 | 239.0 | 226.8 | 215.4 |
| 90  | 197.8 | 170.5 | 202.5 | 242.1 | 230.4 | 218.1 |
| 91  | 200.8 | 171.4 | 205.7 | 245.2 | 234.2 | 220.9 |
| 92  | 203.9 | 172.2 | 208.9 | 248.4 | 237.9 | 223.7 |
| 93  | 207.0 | 173.1 | 212.2 | 251.6 | 241.8 | 226.5 |
| 94  | 210.1 | 173.9 | 215.6 | 254.9 | 245.7 | 229.4 |
| 95  | 213.3 | 174.8 | 219.0 | 258.2 | 249.7 | 232.3 |
| 96  | 216.6 | 175.6 | 222.4 | 261.6 | 253.7 | 235.2 |
| 97  | 219.9 | 176.5 | 226.0 | 265.0 | 257.8 | 238.2 |
| 98  | 223.3 | 177.4 | 229.5 | 268.5 | 262.0 | 241.3 |
| 99  | 226.7 | 178.3 | 233.2 | 272.0 | 266.3 | 244.4 |
| 100 | 230.2 | 179.1 | 236.9 | 275.6 | 270.6 | 247.5 |
| 101 | 233.7 | 180.0 | 240.7 | 279.2 | 275.0 | 250.7 |
| 102 | 237.3 | 180.9 | 244.6 | 283.0 | 279.5 | 253.9 |
| 103 | 241.0 | 181.8 | 248.5 | 286.7 | 284.1 | 257.2 |
| 104 | 244.7 | 182.7 | 252.5 | 290.5 | 288.7 | 260.5 |
| 105 | 248.5 | 183.7 | 256.6 | 294.4 | 293.5 | 263.8 |
| 106 | 252.4 | 184.6 | 260.7 | 298.4 | 298.3 | 267.3 |
| 107 | 256.3 | 185.5 | 265.0 | 302.4 | 303.1 | 270.7 |
| 108 | 260.3 | 186.4 | 269.3 | 306.4 | 308.1 | 274.2 |
| 109 | 264.3 | 187.4 | 273.7 | 310.6 | 313.2 | 277.8 |
| 110 | 268.4 | 188.3 | 278.1 | 314.7 | 318.3 | 281.4 |
| 111 | 272.6 | 189.3 | 282.7 | 319.0 | 323.6 | 285.1 |
| 112 | 276.9 | 190.2 | 287.3 | 323.3 | 328.9 | 288.8 |
| 113 | 281.2 | 191.2 | 292.0 | 327.7 | 334.3 | 292.6 |
| 114 | 285.6 | 192.2 | 296.8 | 332.2 | 339.9 | 296.4 |
| 115 | 290.1 | 193.1 | 301.7 | 336.7 | 345.5 | 300.3 |

|     |       |       |       |       |       |       |
|-----|-------|-------|-------|-------|-------|-------|
| 116 | 294.7 | 194.1 | 306.7 | 341.4 | 351.2 | 304.3 |
| 117 | 299.3 | 195.1 | 311.8 | 346.0 | 357.0 | 308.3 |
| 118 | 304.1 | 196.1 | 317.0 | 350.8 | 362.9 | 312.4 |
| 119 | 308.9 | 197.1 | 322.3 | 355.6 | 368.9 | 316.5 |
| 120 | 313.8 | 198.1 | 327.7 | 360.5 | 375.1 | 320.7 |
| 121 | 318.7 | 199.1 | 333.2 | 365.5 | 381.3 | 324.9 |
| 122 | 323.8 | 200.2 | 338.8 | 370.6 | 387.7 | 329.2 |
| 123 | 328.9 | 201.2 | 344.5 | 375.7 | 394.1 | 333.6 |
| 124 | 334.2 | 202.2 | 350.3 | 381.0 | 400.7 | 338.1 |
| 125 | 339.5 | 203.3 | 356.2 | 386.3 | 407.4 | 342.6 |
| 126 | 344.9 | 204.3 | 362.3 | 391.7 | 414.2 | 347.1 |
| 127 | 350.4 | 205.4 | 368.4 | 397.2 | 421.1 | 351.8 |
| 128 | 356.0 | 206.4 | 374.7 | 402.8 | 428.2 | 356.5 |
| 129 | 361.8 | 207.5 | 381.1 | 408.4 | 435.3 | 361.3 |
| 130 | 367.6 | 208.6 | 387.7 | 414.2 | 442.7 | 366.1 |
| 131 | 373.5 | 209.7 | 394.3 | 420.1 | 450.1 | 371.0 |
| 132 | 379.5 | 210.8 | 401.1 | 426.0 | 457.7 | 376.0 |
| 133 | 385.6 | 211.9 | 408.1 | 432.0 | 465.4 | 381.1 |
| 134 | 391.8 | 213.0 | 415.1 | 438.2 | 473.2 | 386.3 |
| 135 | 398.2 | 214.1 | 422.3 | 444.4 | 481.2 | 391.5 |
| 136 | 404.6 | 215.2 | 429.7 | 450.8 | 489.3 | 396.8 |
| 137 | 411.2 | 216.4 | 437.2 | 457.2 | 497.6 | 402.2 |
| 138 | 417.9 | 217.5 | 444.8 | 463.8 | 506.0 | 407.6 |
| 139 | 424.7 | 218.7 | 452.7 | 470.4 | 514.6 | 413.2 |
| 140 | 431.6 | 219.8 | 460.6 | 477.2 | 523.3 | 418.8 |
| 141 | 438.6 | 221.0 | 468.8 | 484.1 | 532.2 | 424.5 |
| 142 | 445.8 | 222.1 | 477.0 | 491.1 | 541.2 | 430.3 |
| 143 | 453.1 | 223.3 | 485.5 | 498.2 | 550.4 | 436.2 |
| 144 | 460.5 | 224.5 | 494.1 | 505.4 | 559.8 | 442.2 |
| 145 | 468.1 | 225.7 | 503.0 | 512.7 | 569.3 | 448.2 |
| 146 | 475.8 | 226.9 | 512.0 | 520.2 | 579.0 | 454.4 |
| 147 | 483.6 | 228.1 | 521.1 | 527.8 | 588.9 | 460.6 |
| 148 | 491.6 | 229.3 | 530.5 | 535.5 | 598.9 | 467.0 |
| 149 | 499.7 | 230.6 | 540.1 | 543.3 | 609.2 | 473.4 |

**Supplemental Table 1 -Time-integrated activity factors to convert single time point activity concentration (Bq/ml) into estimated decays per unit volume (Bq\*h/mL)**

| <u>Image Time</u><br>(hours) | <u>Submandibular</u> | <u>Tumor</u> | <u>Parotid</u> | <u>Spleen</u> | <u>Kidney</u> | <u>Liver</u> |
|------------------------------|----------------------|--------------|----------------|---------------|---------------|--------------|
| 5                            | 5.39E-06             | 1.37E-05     | 5.15E-06       | 3.44E-06      | 3.69E-06      | 4.03E-06     |
| 6                            | 5.38E-06             | 1.29E-05     | 5.19E-06       | 3.94E-06      | 3.95E-06      | 4.44E-06     |
| 7                            | 5.40E-06             | 1.24E-05     | 5.24E-06       | 4.46E-06      | 4.21E-06      | 4.86E-06     |
| 8                            | 5.44E-06             | 1.20E-05     | 5.31E-06       | 4.99E-06      | 4.47E-06      | 5.26E-06     |
| 9                            | 5.49E-06             | 1.17E-05     | 5.38E-06       | 5.52E-06      | 4.72E-06      | 5.64E-06     |
| 10                           | 5.55E-06             | 1.15E-05     | 5.46E-06       | 6.02E-06      | 4.95E-06      | 5.99E-06     |
| 11                           | 5.62E-06             | 1.13E-05     | 5.54E-06       | 6.48E-06      | 5.18E-06      | 6.31E-06     |
| 12                           | 5.69E-06             | 1.12E-05     | 5.62E-06       | 6.91E-06      | 5.39E-06      | 6.61E-06     |
| 13                           | 5.77E-06             | 1.11E-05     | 5.70E-06       | 7.30E-06      | 5.58E-06      | 6.87E-06     |
| 14                           | 5.84E-06             | 1.10E-05     | 5.78E-06       | 7.64E-06      | 5.76E-06      | 7.11E-06     |
| 15                           | 5.92E-06             | 1.10E-05     | 5.87E-06       | 7.94E-06      | 5.93E-06      | 7.32E-06     |
| 16                           | 6.00E-06             | 1.09E-05     | 5.95E-06       | 8.21E-06      | 6.09E-06      | 7.52E-06     |
| 17                           | 6.07E-06             | 1.09E-05     | 6.04E-06       | 8.44E-06      | 6.23E-06      | 7.69E-06     |
| 18                           | 6.16E-06             | 1.09E-05     | 6.13E-06       | 8.65E-06      | 6.37E-06      | 7.85E-06     |
| 19                           | 6.24E-06             | 1.09E-05     | 6.22E-06       | 8.83E-06      | 6.51E-06      | 8.00E-06     |
| 20                           | 6.32E-06             | 1.09E-05     | 6.30E-06       | 9.00E-06      | 6.64E-06      | 8.14E-06     |
| 21                           | 6.40E-06             | 1.09E-05     | 6.39E-06       | 9.16E-06      | 6.77E-06      | 8.27E-06     |
| 22                           | 6.49E-06             | 1.09E-05     | 6.48E-06       | 9.30E-06      | 6.89E-06      | 8.39E-06     |
| 23                           | 6.58E-06             | 1.10E-05     | 6.58E-06       | 9.44E-06      | 7.01E-06      | 8.51E-06     |
| 24                           | 6.67E-06             | 1.10E-05     | 6.67E-06       | 9.57E-06      | 7.13E-06      | 8.62E-06     |
| 25                           | 6.76E-06             | 1.10E-05     | 6.76E-06       | 9.69E-06      | 7.25E-06      | 8.74E-06     |
| 26                           | 6.85E-06             | 1.11E-05     | 6.86E-06       | 9.81E-06      | 7.37E-06      | 8.85E-06     |
| 27                           | 6.94E-06             | 1.11E-05     | 6.96E-06       | 9.93E-06      | 7.49E-06      | 8.95E-06     |
| 28                           | 7.04E-06             | 1.11E-05     | 7.06E-06       | 1.01E-05      | 7.61E-06      | 9.06E-06     |
| 29                           | 7.13E-06             | 1.12E-05     | 7.16E-06       | 1.02E-05      | 7.73E-06      | 9.17E-06     |
| 30                           | 7.23E-06             | 1.12E-05     | 7.26E-06       | 1.03E-05      | 7.85E-06      | 9.28E-06     |
| 31                           | 7.33E-06             | 1.13E-05     | 7.36E-06       | 1.04E-05      | 7.97E-06      | 9.39E-06     |
| 32                           | 7.43E-06             | 1.13E-05     | 7.46E-06       | 1.05E-05      | 8.10E-06      | 9.50E-06     |
| 33                           | 7.54E-06             | 1.14E-05     | 7.57E-06       | 1.06E-05      | 8.22E-06      | 9.60E-06     |
| 34                           | 7.64E-06             | 1.14E-05     | 7.68E-06       | 1.08E-05      | 8.35E-06      | 9.71E-06     |
| 35                           | 7.75E-06             | 1.15E-05     | 7.79E-06       | 1.09E-05      | 8.48E-06      | 9.83E-06     |
| 36                           | 7.85E-06             | 1.15E-05     | 7.90E-06       | 1.10E-05      | 8.61E-06      | 9.94E-06     |
| 37                           | 7.96E-06             | 1.16E-05     | 8.01E-06       | 1.11E-05      | 8.74E-06      | 1.01E-05     |
| 38                           | 8.08E-06             | 1.16E-05     | 8.13E-06       | 1.13E-05      | 8.88E-06      | 1.02E-05     |
| 39                           | 8.19E-06             | 1.17E-05     | 8.24E-06       | 1.14E-05      | 9.02E-06      | 1.03E-05     |
| 40                           | 8.30E-06             | 1.17E-05     | 8.36E-06       | 1.15E-05      | 9.15E-06      | 1.04E-05     |
| 41                           | 8.42E-06             | 1.18E-05     | 8.48E-06       | 1.16E-05      | 9.30E-06      | 1.05E-05     |
| 42                           | 8.54E-06             | 1.18E-05     | 8.60E-06       | 1.18E-05      | 9.44E-06      | 1.06E-05     |
| 43                           | 8.66E-06             | 1.19E-05     | 8.73E-06       | 1.19E-05      | 9.58E-06      | 1.08E-05     |
| 44                           | 8.78E-06             | 1.19E-05     | 8.85E-06       | 1.20E-05      | 9.73E-06      | 1.09E-05     |
| 45                           | 8.91E-06             | 1.20E-05     | 8.98E-06       | 1.22E-05      | 9.88E-06      | 1.10E-05     |
| 46                           | 9.03E-06             | 1.20E-05     | 9.11E-06       | 1.23E-05      | 1.00E-05      | 1.11E-05     |
| 47                           | 9.16E-06             | 1.21E-05     | 9.24E-06       | 1.25E-05      | 1.02E-05      | 1.13E-05     |
| 48                           | 9.29E-06             | 1.21E-05     | 9.38E-06       | 1.26E-05      | 1.03E-05      | 1.14E-05     |
| 49                           | 9.43E-06             | 1.22E-05     | 9.51E-06       | 1.27E-05      | 1.05E-05      | 1.15E-05     |
| 50                           | 9.56E-06             | 1.22E-05     | 9.65E-06       | 1.29E-05      | 1.07E-05      | 1.17E-05     |
| 51                           | 9.70E-06             | 1.23E-05     | 9.79E-06       | 1.30E-05      | 1.08E-05      | 1.18E-05     |
| 52                           | 9.84E-06             | 1.24E-05     | 9.94E-06       | 1.32E-05      | 1.10E-05      | 1.19E-05     |
| 53                           | 9.98E-06             | 1.24E-05     | 1.01E-05       | 1.34E-05      | 1.12E-05      | 1.21E-05     |

|     |          |          |          |          |          |          |
|-----|----------|----------|----------|----------|----------|----------|
| 54  | 1.01E-05 | 1.25E-05 | 1.02E-05 | 1.35E-05 | 1.13E-05 | 1.22E-05 |
| 55  | 1.03E-05 | 1.25E-05 | 1.04E-05 | 1.37E-05 | 1.15E-05 | 1.24E-05 |
| 56  | 1.04E-05 | 1.26E-05 | 1.05E-05 | 1.38E-05 | 1.17E-05 | 1.25E-05 |
| 57  | 1.06E-05 | 1.26E-05 | 1.07E-05 | 1.40E-05 | 1.19E-05 | 1.27E-05 |
| 58  | 1.07E-05 | 1.27E-05 | 1.08E-05 | 1.42E-05 | 1.21E-05 | 1.28E-05 |
| 59  | 1.09E-05 | 1.28E-05 | 1.10E-05 | 1.43E-05 | 1.23E-05 | 1.30E-05 |
| 60  | 1.10E-05 | 1.28E-05 | 1.12E-05 | 1.45E-05 | 1.25E-05 | 1.31E-05 |
| 61  | 1.12E-05 | 1.29E-05 | 1.13E-05 | 1.47E-05 | 1.26E-05 | 1.33E-05 |
| 62  | 1.14E-05 | 1.29E-05 | 1.15E-05 | 1.48E-05 | 1.28E-05 | 1.34E-05 |
| 63  | 1.15E-05 | 1.30E-05 | 1.17E-05 | 1.50E-05 | 1.30E-05 | 1.36E-05 |
| 64  | 1.17E-05 | 1.31E-05 | 1.18E-05 | 1.52E-05 | 1.33E-05 | 1.38E-05 |
| 65  | 1.19E-05 | 1.31E-05 | 1.20E-05 | 1.54E-05 | 1.35E-05 | 1.39E-05 |
| 66  | 1.20E-05 | 1.32E-05 | 1.22E-05 | 1.56E-05 | 1.37E-05 | 1.41E-05 |
| 67  | 1.22E-05 | 1.32E-05 | 1.24E-05 | 1.58E-05 | 1.39E-05 | 1.43E-05 |
| 68  | 1.24E-05 | 1.33E-05 | 1.26E-05 | 1.60E-05 | 1.41E-05 | 1.44E-05 |
| 69  | 1.26E-05 | 1.34E-05 | 1.28E-05 | 1.61E-05 | 1.43E-05 | 1.46E-05 |
| 70  | 1.28E-05 | 1.34E-05 | 1.29E-05 | 1.63E-05 | 1.46E-05 | 1.48E-05 |
| 71  | 1.29E-05 | 1.35E-05 | 1.31E-05 | 1.65E-05 | 1.48E-05 | 1.50E-05 |
| 72  | 1.31E-05 | 1.36E-05 | 1.33E-05 | 1.67E-05 | 1.50E-05 | 1.51E-05 |
| 73  | 1.33E-05 | 1.36E-05 | 1.35E-05 | 1.70E-05 | 1.53E-05 | 1.53E-05 |
| 74  | 1.35E-05 | 1.37E-05 | 1.38E-05 | 1.72E-05 | 1.55E-05 | 1.55E-05 |
| 75  | 1.37E-05 | 1.38E-05 | 1.40E-05 | 1.74E-05 | 1.57E-05 | 1.57E-05 |
| 76  | 1.39E-05 | 1.38E-05 | 1.42E-05 | 1.76E-05 | 1.60E-05 | 1.59E-05 |
| 77  | 1.41E-05 | 1.39E-05 | 1.44E-05 | 1.78E-05 | 1.62E-05 | 1.61E-05 |
| 78  | 1.43E-05 | 1.40E-05 | 1.46E-05 | 1.80E-05 | 1.65E-05 | 1.63E-05 |
| 79  | 1.46E-05 | 1.40E-05 | 1.48E-05 | 1.83E-05 | 1.68E-05 | 1.65E-05 |
| 80  | 1.48E-05 | 1.41E-05 | 1.51E-05 | 1.85E-05 | 1.70E-05 | 1.67E-05 |
| 81  | 1.50E-05 | 1.42E-05 | 1.53E-05 | 1.87E-05 | 1.73E-05 | 1.69E-05 |
| 82  | 1.52E-05 | 1.42E-05 | 1.55E-05 | 1.90E-05 | 1.76E-05 | 1.71E-05 |
| 83  | 1.54E-05 | 1.43E-05 | 1.58E-05 | 1.92E-05 | 1.79E-05 | 1.73E-05 |
| 84  | 1.57E-05 | 1.44E-05 | 1.60E-05 | 1.94E-05 | 1.82E-05 | 1.75E-05 |
| 85  | 1.59E-05 | 1.44E-05 | 1.63E-05 | 1.97E-05 | 1.84E-05 | 1.78E-05 |
| 86  | 1.62E-05 | 1.45E-05 | 1.65E-05 | 1.99E-05 | 1.87E-05 | 1.80E-05 |
| 87  | 1.64E-05 | 1.46E-05 | 1.68E-05 | 2.02E-05 | 1.90E-05 | 1.82E-05 |
| 88  | 1.66E-05 | 1.46E-05 | 1.70E-05 | 2.05E-05 | 1.94E-05 | 1.84E-05 |
| 89  | 1.69E-05 | 1.47E-05 | 1.73E-05 | 2.07E-05 | 1.97E-05 | 1.87E-05 |
| 90  | 1.72E-05 | 1.48E-05 | 1.76E-05 | 2.10E-05 | 2.00E-05 | 1.89E-05 |
| 91  | 1.74E-05 | 1.49E-05 | 1.78E-05 | 2.13E-05 | 2.03E-05 | 1.91E-05 |
| 92  | 1.77E-05 | 1.49E-05 | 1.81E-05 | 2.15E-05 | 2.06E-05 | 1.94E-05 |
| 93  | 1.79E-05 | 1.50E-05 | 1.84E-05 | 2.18E-05 | 2.10E-05 | 1.96E-05 |
| 94  | 1.82E-05 | 1.51E-05 | 1.87E-05 | 2.21E-05 | 2.13E-05 | 1.99E-05 |
| 95  | 1.85E-05 | 1.52E-05 | 1.90E-05 | 2.24E-05 | 2.16E-05 | 2.01E-05 |
| 96  | 1.88E-05 | 1.52E-05 | 1.93E-05 | 2.27E-05 | 2.20E-05 | 2.04E-05 |
| 97  | 1.91E-05 | 1.53E-05 | 1.96E-05 | 2.30E-05 | 2.24E-05 | 2.07E-05 |
| 98  | 1.94E-05 | 1.54E-05 | 1.99E-05 | 2.33E-05 | 2.27E-05 | 2.09E-05 |
| 99  | 1.97E-05 | 1.55E-05 | 2.02E-05 | 2.36E-05 | 2.31E-05 | 2.12E-05 |
| 100 | 2.00E-05 | 1.55E-05 | 2.05E-05 | 2.39E-05 | 2.35E-05 | 2.15E-05 |
| 101 | 2.03E-05 | 1.56E-05 | 2.09E-05 | 2.42E-05 | 2.38E-05 | 2.17E-05 |
| 102 | 2.06E-05 | 1.57E-05 | 2.12E-05 | 2.45E-05 | 2.42E-05 | 2.20E-05 |
| 103 | 2.09E-05 | 1.58E-05 | 2.15E-05 | 2.49E-05 | 2.46E-05 | 2.23E-05 |

|     |          |          |          |          |          |          |
|-----|----------|----------|----------|----------|----------|----------|
| 104 | 2.12E-05 | 1.58E-05 | 2.19E-05 | 2.52E-05 | 2.50E-05 | 2.26E-05 |
| 105 | 2.15E-05 | 1.59E-05 | 2.22E-05 | 2.55E-05 | 2.54E-05 | 2.29E-05 |
| 106 | 2.19E-05 | 1.60E-05 | 2.26E-05 | 2.59E-05 | 2.59E-05 | 2.32E-05 |
| 107 | 2.22E-05 | 1.61E-05 | 2.30E-05 | 2.62E-05 | 2.63E-05 | 2.35E-05 |
| 108 | 2.26E-05 | 1.62E-05 | 2.33E-05 | 2.66E-05 | 2.67E-05 | 2.38E-05 |
| 109 | 2.29E-05 | 1.62E-05 | 2.37E-05 | 2.69E-05 | 2.72E-05 | 2.41E-05 |
| 110 | 2.33E-05 | 1.63E-05 | 2.41E-05 | 2.73E-05 | 2.76E-05 | 2.44E-05 |
| 111 | 2.36E-05 | 1.64E-05 | 2.45E-05 | 2.77E-05 | 2.81E-05 | 2.47E-05 |
| 112 | 2.40E-05 | 1.65E-05 | 2.49E-05 | 2.80E-05 | 2.85E-05 | 2.50E-05 |
| 113 | 2.44E-05 | 1.66E-05 | 2.53E-05 | 2.84E-05 | 2.90E-05 | 2.54E-05 |
| 114 | 2.48E-05 | 1.67E-05 | 2.57E-05 | 2.88E-05 | 2.95E-05 | 2.57E-05 |
| 115 | 2.52E-05 | 1.67E-05 | 2.62E-05 | 2.92E-05 | 3.00E-05 | 2.60E-05 |
| 116 | 2.56E-05 | 1.68E-05 | 2.66E-05 | 2.96E-05 | 3.04E-05 | 2.64E-05 |
| 117 | 2.60E-05 | 1.69E-05 | 2.70E-05 | 3.00E-05 | 3.10E-05 | 2.67E-05 |
| 118 | 2.64E-05 | 1.70E-05 | 2.75E-05 | 3.04E-05 | 3.15E-05 | 2.71E-05 |
| 119 | 2.68E-05 | 1.71E-05 | 2.79E-05 | 3.08E-05 | 3.20E-05 | 2.74E-05 |
| 120 | 2.72E-05 | 1.72E-05 | 2.84E-05 | 3.13E-05 | 3.25E-05 | 2.78E-05 |
| 121 | 2.76E-05 | 1.73E-05 | 2.89E-05 | 3.17E-05 | 3.31E-05 | 2.82E-05 |
| 122 | 2.81E-05 | 1.74E-05 | 2.94E-05 | 3.21E-05 | 3.36E-05 | 2.85E-05 |
| 123 | 2.85E-05 | 1.74E-05 | 2.99E-05 | 3.26E-05 | 3.42E-05 | 2.89E-05 |
| 124 | 2.90E-05 | 1.75E-05 | 3.04E-05 | 3.30E-05 | 3.47E-05 | 2.93E-05 |
| 125 | 2.94E-05 | 1.76E-05 | 3.09E-05 | 3.35E-05 | 3.53E-05 | 2.97E-05 |
| 126 | 2.99E-05 | 1.77E-05 | 3.14E-05 | 3.40E-05 | 3.59E-05 | 3.01E-05 |
| 127 | 3.04E-05 | 1.78E-05 | 3.19E-05 | 3.44E-05 | 3.65E-05 | 3.05E-05 |
| 128 | 3.09E-05 | 1.79E-05 | 3.25E-05 | 3.49E-05 | 3.71E-05 | 3.09E-05 |
| 129 | 3.14E-05 | 1.80E-05 | 3.30E-05 | 3.54E-05 | 3.77E-05 | 3.13E-05 |
| 130 | 3.19E-05 | 1.81E-05 | 3.36E-05 | 3.59E-05 | 3.84E-05 | 3.17E-05 |
| 131 | 3.24E-05 | 1.82E-05 | 3.42E-05 | 3.64E-05 | 3.90E-05 | 3.22E-05 |
| 132 | 3.29E-05 | 1.83E-05 | 3.48E-05 | 3.69E-05 | 3.97E-05 | 3.26E-05 |
| 133 | 3.34E-05 | 1.84E-05 | 3.54E-05 | 3.75E-05 | 4.03E-05 | 3.30E-05 |
| 134 | 3.40E-05 | 1.85E-05 | 3.60E-05 | 3.80E-05 | 4.10E-05 | 3.35E-05 |
| 135 | 3.45E-05 | 1.86E-05 | 3.66E-05 | 3.85E-05 | 4.17E-05 | 3.39E-05 |
| 136 | 3.51E-05 | 1.87E-05 | 3.73E-05 | 3.91E-05 | 4.24E-05 | 3.44E-05 |
| 137 | 3.57E-05 | 1.88E-05 | 3.79E-05 | 3.96E-05 | 4.31E-05 | 3.49E-05 |
| 138 | 3.62E-05 | 1.89E-05 | 3.86E-05 | 4.02E-05 | 4.39E-05 | 3.53E-05 |
| 139 | 3.68E-05 | 1.90E-05 | 3.92E-05 | 4.08E-05 | 4.46E-05 | 3.58E-05 |
| 140 | 3.74E-05 | 1.91E-05 | 3.99E-05 | 4.14E-05 | 4.54E-05 | 3.63E-05 |
| 141 | 3.80E-05 | 1.92E-05 | 4.06E-05 | 4.20E-05 | 4.61E-05 | 3.68E-05 |
| 142 | 3.87E-05 | 1.93E-05 | 4.14E-05 | 4.26E-05 | 4.69E-05 | 3.73E-05 |
| 143 | 3.93E-05 | 1.94E-05 | 4.21E-05 | 4.32E-05 | 4.77E-05 | 3.78E-05 |
| 144 | 3.99E-05 | 1.95E-05 | 4.28E-05 | 4.38E-05 | 4.85E-05 | 3.83E-05 |
| 145 | 4.06E-05 | 1.96E-05 | 4.36E-05 | 4.45E-05 | 4.94E-05 | 3.89E-05 |
| 146 | 4.13E-05 | 1.97E-05 | 4.44E-05 | 4.51E-05 | 5.02E-05 | 3.94E-05 |
| 147 | 4.19E-05 | 1.98E-05 | 4.52E-05 | 4.58E-05 | 5.11E-05 | 3.99E-05 |
| 148 | 4.26E-05 | 1.99E-05 | 4.60E-05 | 4.64E-05 | 5.19E-05 | 4.05E-05 |
| 149 | 4.33E-05 | 2.00E-05 | 4.68E-05 | 4.71E-05 | 5.28E-05 | 4.10E-05 |

**Supplemental Table 2 - Dose factors to convert single time point measurement of Activity Concentration (Bq/mL) into radiation**

**absorbed dose (Gy) assuming a nominal tissue density of one gram per milliliter (23)**

| Image Time (hours) | Submandibular | Tumor | Parotid | Spleen | Kidney | Liver |
|--------------------|---------------|-------|---------|--------|--------|-------|
| 5                  | 16.4          | 25.7  | 18.2    | 32.1   | 22.8   | 28.5  |
| 6                  | 14.9          | 24.6  | 16.2    | 29.7   | 19.5   | 27.4  |
| 7                  | 14.0          | 23.9  | 14.8    | 27.8   | 16.9   | 26.3  |
| 8                  | 13.8          | 23.3  | 13.8    | 26.7   | 14.8   | 25.5  |
| 9                  | 13.7          | 22.9  | 13.3    | 26.1   | 13.1   | 25.1  |
| 10                 | 13.8          | 22.6  | 13.0    | 25.5   | 12.4   | 24.6  |
| 11                 | 13.9          | 22.3  | 12.8    | 25.2   | 12.2   | 24.1  |
| 12                 | 13.9          | 22.0  | 12.7    | 25.0   | 12.2   | 23.6  |
| 13                 | 13.9          | 21.7  | 12.5    | 24.7   | 12.2   | 23.1  |
| 14                 | 13.9          | 21.5  | 12.3    | 24.6   | 12.2   | 22.9  |
| 15                 | 13.8          | 21.3  | 12.1    | 24.5   | 12.3   | 22.6  |
| 16                 | 13.7          | 21.1  | 11.9    | 24.3   | 12.3   | 22.3  |
| 17                 | 13.6          | 20.8  | 11.6    | 24.1   | 12.3   | 22.0  |
| 18                 | 13.5          | 20.6  | 11.4    | 23.8   | 12.2   | 21.7  |
| 19                 | 13.3          | 20.4  | 11.2    | 23.5   | 12.1   | 21.4  |
| 20                 | 13.2          | 20.2  | 11.0    | 23.1   | 11.9   | 21.0  |
| 21                 | 13.0          | 20.0  | 10.7    | 22.7   | 11.8   | 20.6  |
| 22                 | 12.7          | 19.8  | 10.5    | 22.3   | 11.6   | 20.3  |
| 23                 | 12.5          | 19.6  | 10.2    | 21.9   | 11.4   | 19.9  |
| 24                 | 12.3          | 19.4  | 10.0    | 21.4   | 11.2   | 19.5  |
| 25                 | 12.0          | 19.2  | 9.7     | 21.0   | 11.0   | 19.1  |
| 26                 | 11.8          | 18.9  | 9.4     | 20.5   | 10.9   | 18.7  |
| 27                 | 11.5          | 18.7  | 9.1     | 20.0   | 10.7   | 18.3  |
| 28                 | 11.2          | 18.5  | 8.8     | 19.5   | 10.5   | 17.9  |
| 29                 | 10.9          | 18.3  | 8.6     | 19.1   | 10.3   | 17.5  |
| 30                 | 10.6          | 18.1  | 8.3     | 18.6   | 10.1   | 17.1  |
| 31                 | 10.4          | 17.9  | 8.0     | 18.1   | 10.0   | 16.7  |
| 32                 | 10.1          | 17.7  | 7.7     | 17.6   | 9.8    | 16.3  |
| 33                 | 9.8           | 17.5  | 7.5     | 17.1   | 9.6    | 16.0  |
| 34                 | 9.5           | 17.3  | 7.2     | 16.6   | 9.4    | 15.7  |
| 35                 | 9.2           | 17.0  | 6.9     | 16.1   | 9.2    | 15.3  |
| 36                 | 8.9           | 16.8  | 6.7     | 15.6   | 9.0    | 15.0  |
| 37                 | 8.6           | 16.6  | 6.4     | 15.1   | 8.9    | 14.7  |
| 38                 | 8.4           | 16.4  | 6.1     | 14.7   | 8.7    | 14.3  |
| 39                 | 8.1           | 16.2  | 5.8     | 14.3   | 8.5    | 14.0  |
| 40                 | 7.8           | 16.0  | 5.6     | 14.0   | 8.4    | 13.7  |
| 41                 | 7.5           | 15.8  | 5.3     | 13.6   | 8.3    | 13.4  |
| 42                 | 7.3           | 15.6  | 5.0     | 13.3   | 8.2    | 13.1  |
| 43                 | 7.0           | 15.4  | 4.8     | 13.0   | 8.1    | 12.7  |
| 44                 | 6.8           | 15.2  | 4.5     | 12.7   | 7.9    | 12.4  |
| 45                 | 6.6           | 14.9  | 4.3     | 12.4   | 7.8    | 12.1  |
| 46                 | 6.4           | 14.7  | 4.2     | 12.1   | 7.7    | 11.8  |
| 47                 | 6.2           | 14.5  | 4.0     | 11.8   | 7.6    | 11.5  |
| 48                 | 6.0           | 14.3  | 3.9     | 11.6   | 7.5    | 11.2  |
| 49                 | 5.8           | 14.1  | 3.9     | 11.3   | 7.4    | 10.9  |



|    |      |      |      |      |      |      |
|----|------|------|------|------|------|------|
| 50 | 5.6  | 13.9 | 3.9  | 11.1 | 7.4  | 10.6 |
| 51 | 5.4  | 13.7 | 3.9  | 10.9 | 7.3  | 10.3 |
| 52 | 5.3  | 13.5 | 3.9  | 10.8 | 7.3  | 10.1 |
| 53 | 5.2  | 13.3 | 4.0  | 10.7 | 7.2  | 9.8  |
| 54 | 5.1  | 13.1 | 4.0  | 10.6 | 7.2  | 9.6  |
| 55 | 5.0  | 12.8 | 4.1  | 10.5 | 7.2  | 9.4  |
| 56 | 4.9  | 12.6 | 4.2  | 10.4 | 7.3  | 9.2  |
| 57 | 4.9  | 12.4 | 4.3  | 10.3 | 7.3  | 9.1  |
| 58 | 4.9  | 12.2 | 4.4  | 10.2 | 7.4  | 8.9  |
| 59 | 5.0  | 12.0 | 4.5  | 10.2 | 7.5  | 8.7  |
| 60 | 5.0  | 11.8 | 4.7  | 10.2 | 7.7  | 8.6  |
| 61 | 5.1  | 11.6 | 4.9  | 10.1 | 7.8  | 8.5  |
| 62 | 5.1  | 11.4 | 5.1  | 10.2 | 8.0  | 8.4  |
| 63 | 5.2  | 11.2 | 5.3  | 10.2 | 8.2  | 8.3  |
| 64 | 5.3  | 11.0 | 5.6  | 10.2 | 8.5  | 8.2  |
| 65 | 5.3  | 10.8 | 5.8  | 10.3 | 8.7  | 8.2  |
| 66 | 5.4  | 10.5 | 6.1  | 10.4 | 8.9  | 8.1  |
| 67 | 5.5  | 10.3 | 6.3  | 10.5 | 9.1  | 8.1  |
| 68 | 5.7  | 10.1 | 6.6  | 10.5 | 9.3  | 8.1  |
| 69 | 5.8  | 9.9  | 6.9  | 10.7 | 9.5  | 8.1  |
| 70 | 6.0  | 9.7  | 7.2  | 10.8 | 9.7  | 8.1  |
| 71 | 6.2  | 9.5  | 7.5  | 11.0 | 10.0 | 8.1  |
| 72 | 6.4  | 9.3  | 7.8  | 11.2 | 10.2 | 8.1  |
| 73 | 6.6  | 9.1  | 8.1  | 11.5 | 10.4 | 8.1  |
| 74 | 6.9  | 8.9  | 8.4  | 11.8 | 10.6 | 8.1  |
| 75 | 7.1  | 8.7  | 8.7  | 12.0 | 10.8 | 8.1  |
| 76 | 7.3  | 8.5  | 9.0  | 12.3 | 11.1 | 8.2  |
| 77 | 7.6  | 8.3  | 9.4  | 12.6 | 11.3 | 8.2  |
| 78 | 7.8  | 8.1  | 9.7  | 12.8 | 11.5 | 8.3  |
| 79 | 8.1  | 7.9  | 10.0 | 13.1 | 11.7 | 8.4  |
| 80 | 8.4  | 7.7  | 10.3 | 13.4 | 12.0 | 8.5  |
| 81 | 8.6  | 7.5  | 10.7 | 13.6 | 12.2 | 8.6  |
| 82 | 8.9  | 7.3  | 11.0 | 13.9 | 12.4 | 8.8  |
| 83 | 9.1  | 7.1  | 11.4 | 14.2 | 12.6 | 8.9  |
| 84 | 9.4  | 7.0  | 11.8 | 14.5 | 12.9 | 9.0  |
| 85 | 9.7  | 6.8  | 12.2 | 14.7 | 13.1 | 9.1  |
| 86 | 10.1 | 6.6  | 12.5 | 15.0 | 13.3 | 9.3  |
| 87 | 10.4 | 6.4  | 12.9 | 15.3 | 13.6 | 9.4  |
| 88 | 10.8 | 6.3  | 13.3 | 15.6 | 13.8 | 9.7  |
| 89 | 11.1 | 6.1  | 13.7 | 16.0 | 14.1 | 9.9  |
| 90 | 11.5 | 5.9  | 14.1 | 16.3 | 14.3 | 10.1 |
| 91 | 11.8 | 5.8  | 14.6 | 16.7 | 14.5 | 10.5 |
| 92 | 12.2 | 5.6  | 15.0 | 17.0 | 14.8 | 10.8 |
| 93 | 12.5 | 5.5  | 15.4 | 17.4 | 15.0 | 11.1 |
| 94 | 12.9 | 5.3  | 15.8 | 17.8 | 15.3 | 11.4 |
| 95 | 13.3 | 5.2  | 16.3 | 18.2 | 15.5 | 11.7 |
| 96 | 13.6 | 5.1  | 16.7 | 18.6 | 15.8 | 12.1 |
| 97 | 14.0 | 4.9  | 17.1 | 19.0 | 16.1 | 12.4 |
| 98 | 14.3 | 4.8  | 17.6 | 19.4 | 16.3 | 12.7 |
| 99 | 14.7 | 4.7  | 18.0 | 19.8 | 16.6 | 13.0 |

|     |      |     |      |      |      |      |
|-----|------|-----|------|------|------|------|
| 100 | 15.1 | 4.6 | 18.5 | 20.1 | 16.8 | 13.4 |
| 101 | 15.4 | 4.5 | 18.9 | 20.5 | 17.1 | 13.7 |
| 102 | 15.8 | 4.4 | 19.4 | 20.9 | 17.3 | 14.0 |
| 103 | 16.2 | 4.4 | 19.8 | 21.3 | 17.6 | 14.3 |
| 104 | 16.5 | 4.3 | 20.3 | 21.7 | 17.8 | 14.6 |
| 105 | 16.9 | 4.2 | 20.7 | 22.1 | 18.1 | 15.0 |
| 106 | 17.3 | 4.2 | 21.2 | 22.4 | 18.4 | 15.3 |
| 107 | 17.7 | 4.1 | 21.6 | 22.8 | 18.6 | 15.6 |
| 108 | 18.0 | 4.1 | 22.1 | 23.2 | 18.9 | 15.9 |
| 109 | 18.4 | 4.0 | 22.6 | 23.6 | 19.2 | 16.2 |
| 110 | 18.8 | 4.0 | 23.0 | 24.0 | 19.4 | 16.6 |
| 111 | 19.2 | 4.0 | 23.5 | 24.3 | 19.7 | 16.9 |
| 112 | 19.5 | 4.0 | 24.0 | 24.8 | 20.0 | 17.2 |
| 113 | 19.9 | 4.0 | 24.5 | 25.2 | 20.3 | 17.5 |
| 114 | 20.3 | 4.1 | 24.9 | 25.6 | 20.5 | 17.8 |
| 115 | 20.7 | 4.1 | 25.4 | 26.0 | 20.8 | 18.2 |
| 116 | 21.0 | 4.1 | 25.9 | 26.4 | 21.1 | 18.5 |
| 117 | 21.4 | 4.2 | 26.4 | 26.9 | 21.3 | 18.8 |
| 118 | 21.8 | 4.3 | 26.9 | 27.3 | 21.6 | 19.1 |
| 119 | 22.2 | 4.3 | 27.4 | 27.7 | 21.9 | 19.4 |
| 120 | 22.6 | 4.4 | 27.9 | 28.1 | 22.2 | 19.7 |
| 121 | 22.9 | 4.5 | 28.4 | 28.6 | 22.4 | 20.0 |
| 122 | 23.3 | 4.6 | 28.9 | 29.0 | 22.7 | 20.4 |
| 123 | 23.7 | 4.7 | 29.4 | 29.4 | 23.0 | 20.7 |
| 124 | 24.1 | 4.8 | 29.9 | 29.8 | 23.3 | 21.0 |
| 125 | 24.5 | 4.9 | 30.4 | 30.2 | 23.5 | 21.3 |
| 126 | 24.9 | 5.1 | 30.9 | 30.7 | 23.8 | 21.6 |
| 127 | 25.3 | 5.2 | 31.4 | 31.1 | 24.1 | 22.0 |
| 128 | 25.6 | 5.3 | 31.9 | 31.5 | 24.4 | 22.3 |
| 129 | 26.0 | 5.5 | 32.4 | 31.9 | 24.6 | 22.6 |
| 130 | 26.4 | 5.6 | 33.0 | 32.3 | 24.9 | 22.9 |
| 131 | 26.8 | 5.8 | 33.5 | 32.7 | 25.2 | 23.3 |
| 132 | 27.2 | 6.0 | 34.0 | 33.2 | 25.5 | 23.6 |
| 133 | 27.6 | 6.2 | 34.5 | 33.6 | 25.8 | 23.9 |
| 134 | 28.0 | 6.4 | 35.1 | 34.0 | 26.0 | 24.2 |
| 135 | 28.4 | 6.6 | 35.6 | 34.4 | 26.3 | 24.6 |
| 136 | 28.7 | 6.8 | 36.1 | 34.8 | 26.6 | 24.9 |
| 137 | 29.1 | 7.0 | 36.7 | 35.2 | 26.9 | 25.2 |
| 138 | 29.5 | 7.2 | 37.2 | 35.6 | 27.2 | 25.5 |
| 139 | 29.9 | 7.4 | 37.7 | 36.0 | 27.5 | 25.9 |
| 140 | 30.3 | 7.7 | 38.3 | 36.5 | 27.8 | 26.2 |
| 141 | 30.7 | 7.9 | 38.8 | 36.9 | 28.1 | 26.5 |
| 142 | 31.1 | 8.1 | 39.4 | 37.3 | 28.4 | 26.8 |
| 143 | 31.5 | 8.3 | 39.9 | 37.7 | 28.7 | 27.1 |
| 144 | 31.9 | 8.5 | 40.5 | 38.1 | 29.0 | 27.5 |
| 145 | 32.3 | 8.8 | 41.0 | 38.5 | 29.3 | 27.8 |
| 146 | 32.7 | 9.0 | 41.6 | 38.9 | 29.5 | 28.1 |
| 147 | 33.1 | 9.2 | 42.2 | 39.3 | 29.8 | 28.4 |
| 148 | 33.5 | 9.4 | 42.7 | 39.7 | 30.1 | 28.7 |
| 149 | 33.8 | 9.7 | 43.3 | 40.1 | 30.4 | 29.0 |

**Supplemental Table 3 - Mean absolute error of population predictions for each organ and time point expressed as a percentage out of 100%**

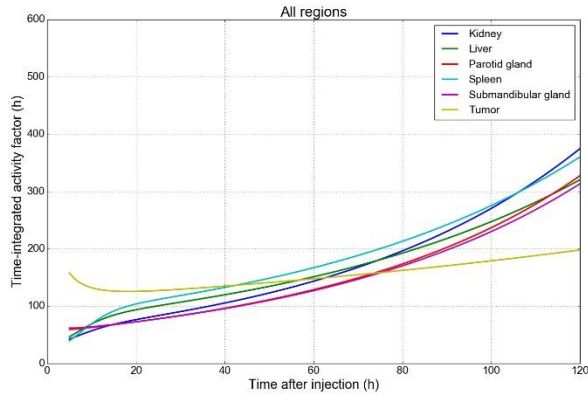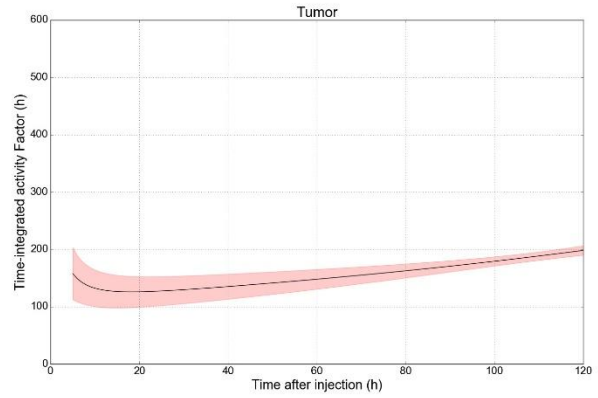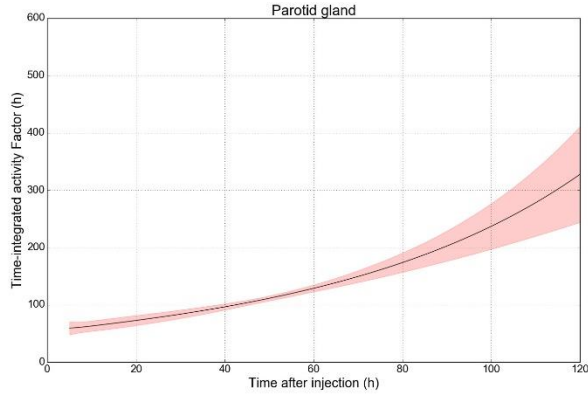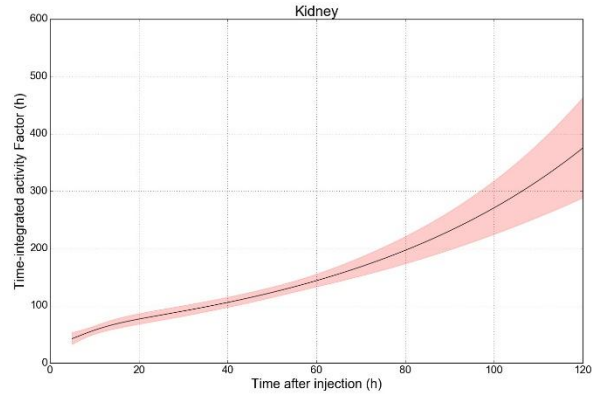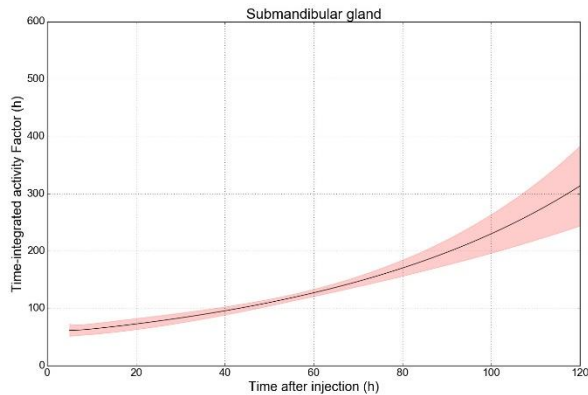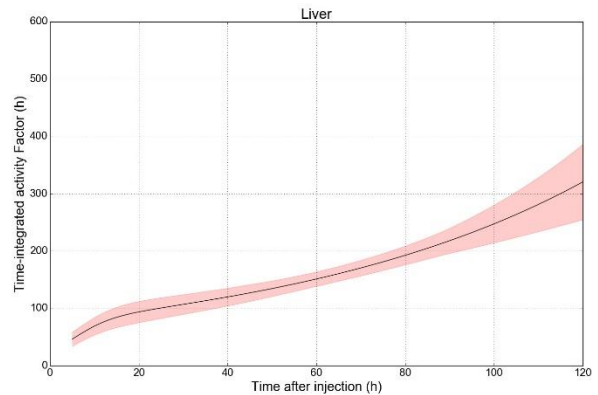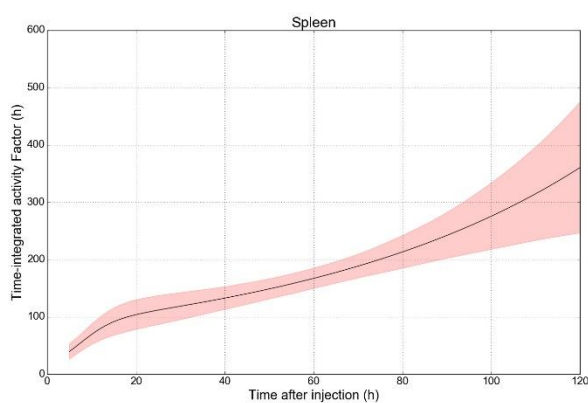

**Supplemental Figure 2 - Tissue-specific time integrated activity factors for all considered organs. Average deviation from the mean of normalized population values is given in shaded region for each post-treatment image time**

$$A(t) = -A_1 * e^{-k_1*t} + A_2 * e^{-k_2*t} + A_3 * e^{-k_3*t}$$

$$-A_1 = A_2 + A_3$$

Generic tri-exponential equation used to define organ and tumor time-activity curves. Note negative parameter  $A_1$  denotes uptake phase and the sum of  $A_2 + A_3$  equal to  $-A_1$  which results in curves that pass

through zero at  $t=0$  and approaches zero as  $t=\infty$ .

$$Act(t) = S_p(t_N) * (-A_{p,1} * e^{-k_{p,1}*t} + A_{p,2} * e^{-k_{p,2}*t} + A_{p,3} * e^{-k_{p,3}*t})$$

$$S_p(t_N) = \frac{Act(t)}{(-A_{p,1} * e^{-k_{p,1}*t} + A_{p,2} * e^{-k_{p,2}*t} + A_{p,3} * e^{-k_{p,3}*t})}$$

The time-dependent scaling factor  $S_p(t_N)$  is determined for each time-activity curve to normalize the amplitude to match the single time point measurement  $Act(t)$ .

$$\tilde{A}_p = \int_0^{\infty} S_p(t_N) * (-A_{p,1} * e^{-k_{p,1}*t} + A_{p,2} * e^{-k_{p,2}*t} + A_{p,3} * e^{-k_{p,3}*t}) * dt$$

Time-integrated activity is taken as the area under the curve from  $t=0$  to  $t=\infty$  for the normalized curve for each region in the population model.

$$\tilde{A}_p = S_p(t_N) * \left( \frac{-A_{p,1}}{k_{p,1}} + \frac{A_{p,2}}{k_{p,2}} + \frac{A_{p,3}}{k_{p,3}} \right)$$

For equations of exponential decay, the integral may be solved as the ratio of the amplitude parameter,  $A$ , over the rate parameter,  $k$ . In this case the time-integral of a single region,  $\tilde{A}_p$ , is taken as the sum of the three exponential phases is taken and multiplied by the time-dependent scaling factor,  $S_p(t_N)$ .

$$\tilde{A}_p = \frac{\sum_{p=1}^n S_p(t_N) * \left( \frac{-A_{p,1}}{k_{p,1}} + \frac{A_{p,2}}{k_{p,2}} + \frac{A_{p,3}}{k_{p,3}} \right)}{n}$$

To assess as a population model, the normalized area under each time-activity curve,  $\tilde{A}_p$ , is assessed for mean across the cohort of  $n$  cases.
